## Coronary, aortic and carotid artery inflammation by 18F-fluorodeoxyglucose positron emission tomography in acute and chronic coronary artery disease

Nammas W.; Uotila S.; Teuvo J.; Pietila M.; Airaksinen J.; Roivainen A.; Bax J.; Knuuti J.; Saraste A.

University of Turku, Turku, Finland

**Funding Acknowledgements:** Type of funding sources: None.

**Background:** 18F-fluorodeoxyglucose (18F-FDG) positron emission tomography (PET) can detect arterial inflammation in individuals with atherosclerosis, but the associations among different vascular territories for 18F-FDG uptake are not known.

**Purpose:** We explored any possible correlation between arterial inflammation quantified by 18F-FDG PET in the aorta, carotid arteries, and coronary arteries in patients presenting with acute coronary syndrome (ACS), or chronic coronary artery disease (CAD).

**Methods:** Prospectively, we performed hybrid computed tomography angiography and 18F-FDG PET in 43 patients (26 ACS and 17 chronic CAD) at  $6.6 \pm 5.7$  days following invasive coronary angiography. 18F-FDG PET was performed 90 minutes after injection of  $302.2 \pm 28.4$  MBq 18F-FDG. Arterial 18F-FDG uptake was measured in the thoracic aorta, carotid arteries, and coronary arteries, and expressed as the target-to-background ratio (TBR; the ratio between arterial maximal standardized uptake value normalized to blood pool mean standardized uptake value) in the whole artery, and in the most diseased segment (MDS).

**Results:** Mean age was  $64.9 \pm 9.1$  years, 90.7% males. The whole artery 18F-FDG uptake was higher in the aorta than in the carotid arteries (median TBR 2.23, interquartile range [0.36] vs. 1.88 [0.42],  $p < 0.001$ ); whereas uptake in the coronary arteries was lower than in the aorta or carotid arteries (1.13 [0.23],  $p < 0.001$  both). Similarly, 18F-FDG uptake in the aortic MDS was higher than in the carotid MDS (2.75 [0.62] vs. 2.25 [0.63],  $p < 0.001$ ); whereas 18F-FDG uptake in the coronary MDS was the lowest (1.40 [0.33],  $p < 0.001$  both). These findings were consistent in both ACS and chronic CAD patients. The whole artery 18F-FDG uptake of the aorta and carotid arteries correlated in patients with ACS ( $r = 0.58$ ,  $p = 0.002$ ), but not in patients with chronic CAD ( $r = 0.21$ ,  $p = 0.3$ ). There was no correlation between the whole artery 18F-FDG uptake in the coronary arteries and either the aorta or carotid arteries in the whole cohort ( $r = -0.16$ ,  $p = 0.2$ ,  $r = 0.01$ ,  $p = 0.9$ , respectively), in patients with ACS ( $r = 0.06$ ,  $p = 0.7$ ,  $r = -0.01$ ,  $p = 0.9$ , respectively), or in those with chronic CAD ( $r = -0.4$ ,  $p = 0.1$ ,  $r = -0.09$ ,  $p = 0.7$ , respectively).

**Conclusions:** In patients with ACS or chronic CAD, large arteries had higher 18F-FDG uptake than the coronary arteries. The intensity of 18F-FDG uptake in the coronary arteries did not correlate with that in the carotid arteries or the aorta, indicating that disease activity differs between large arteries and coronary arteries.
